# Supplementary material for: Phase-tuned neuronal firing encodes human contextual representations for navigational goals
Source: eLife journal article supplement (doi:10.7554/elife.32554), 2018-06-22
Supplement: supp [file elife-32554-supp-v1.zip]

Archive with 6 entries (6 files):
- elife_poa_e32554_Figure_1_figure_supplement_1.pdf
- elife_poa_e32554_Transparent_Reporting_File.docx
- elife_poa_e32554_Figure_4_figure_supplement_2.pdf
- elife_poa_e32554_Figure_2_figure_supplement_2.pdf
- elife_poa_e32554_Figure_2_figure_supplement_1.pdf
- elife_poa_e32554_Figure_4_figure_supplement_1.pdf
