# Supplementary material for: Phase-tuned neuronal firing encodes human contextual representations for navigational goals
Source: eLife journal article supplement (doi:10.7554/elife.32554), 2018-06-22

**A.** Example Delivery to **Goal 2**

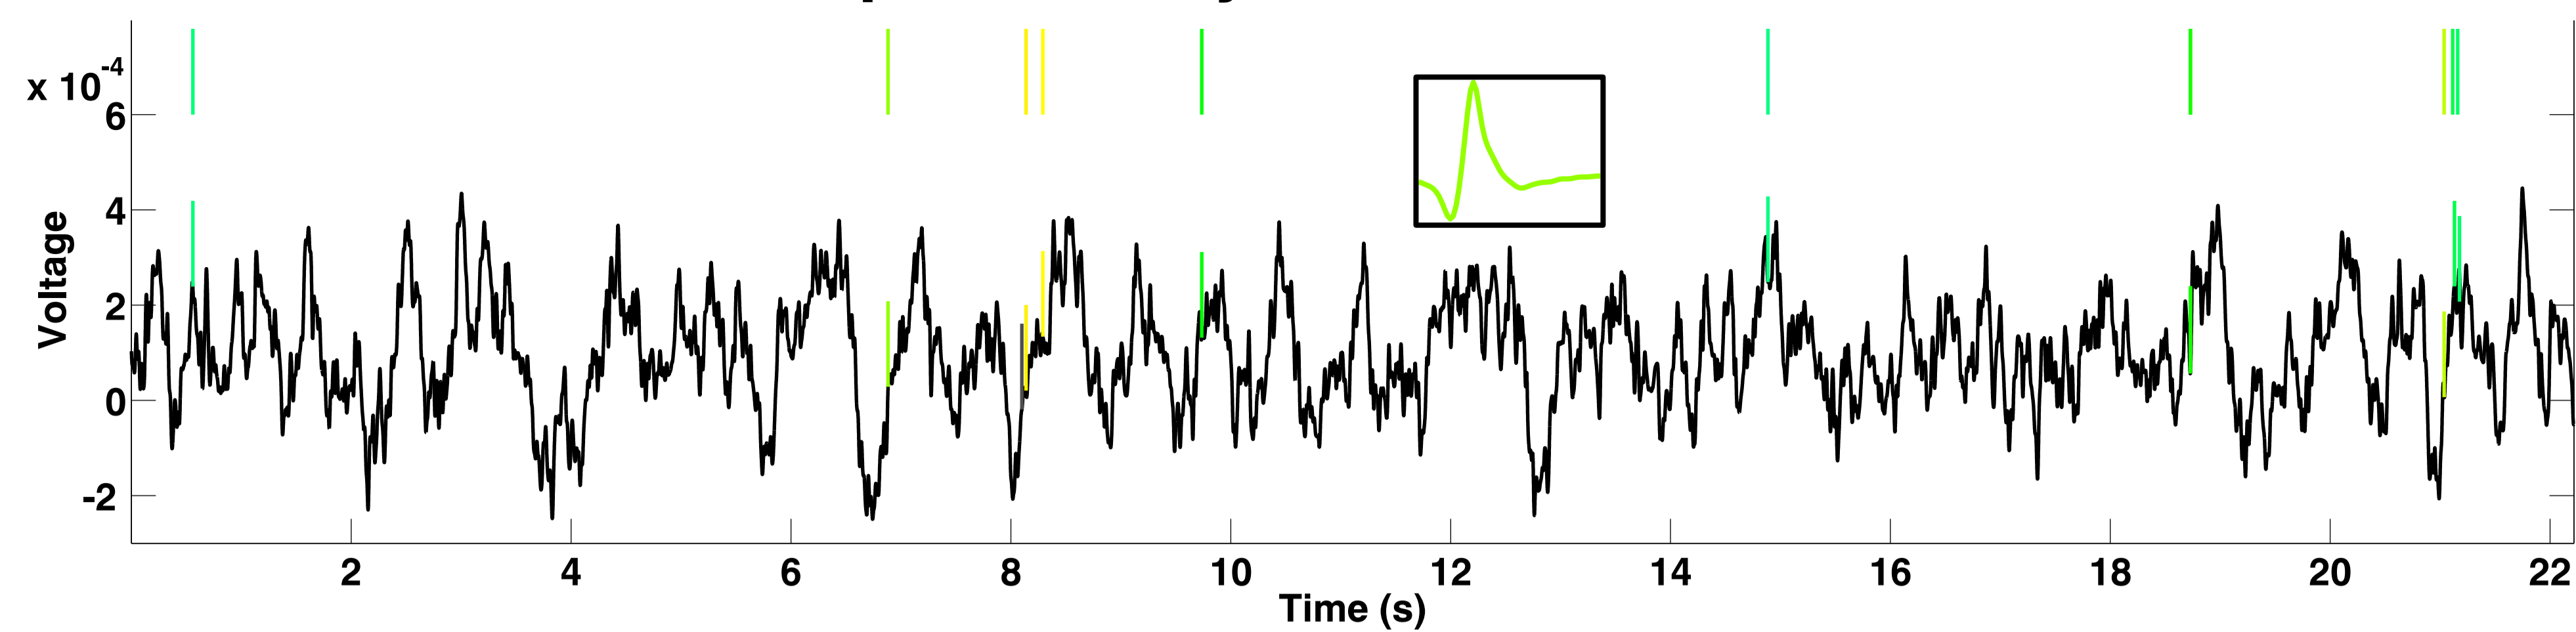

**B.** Spike Phases during Planning

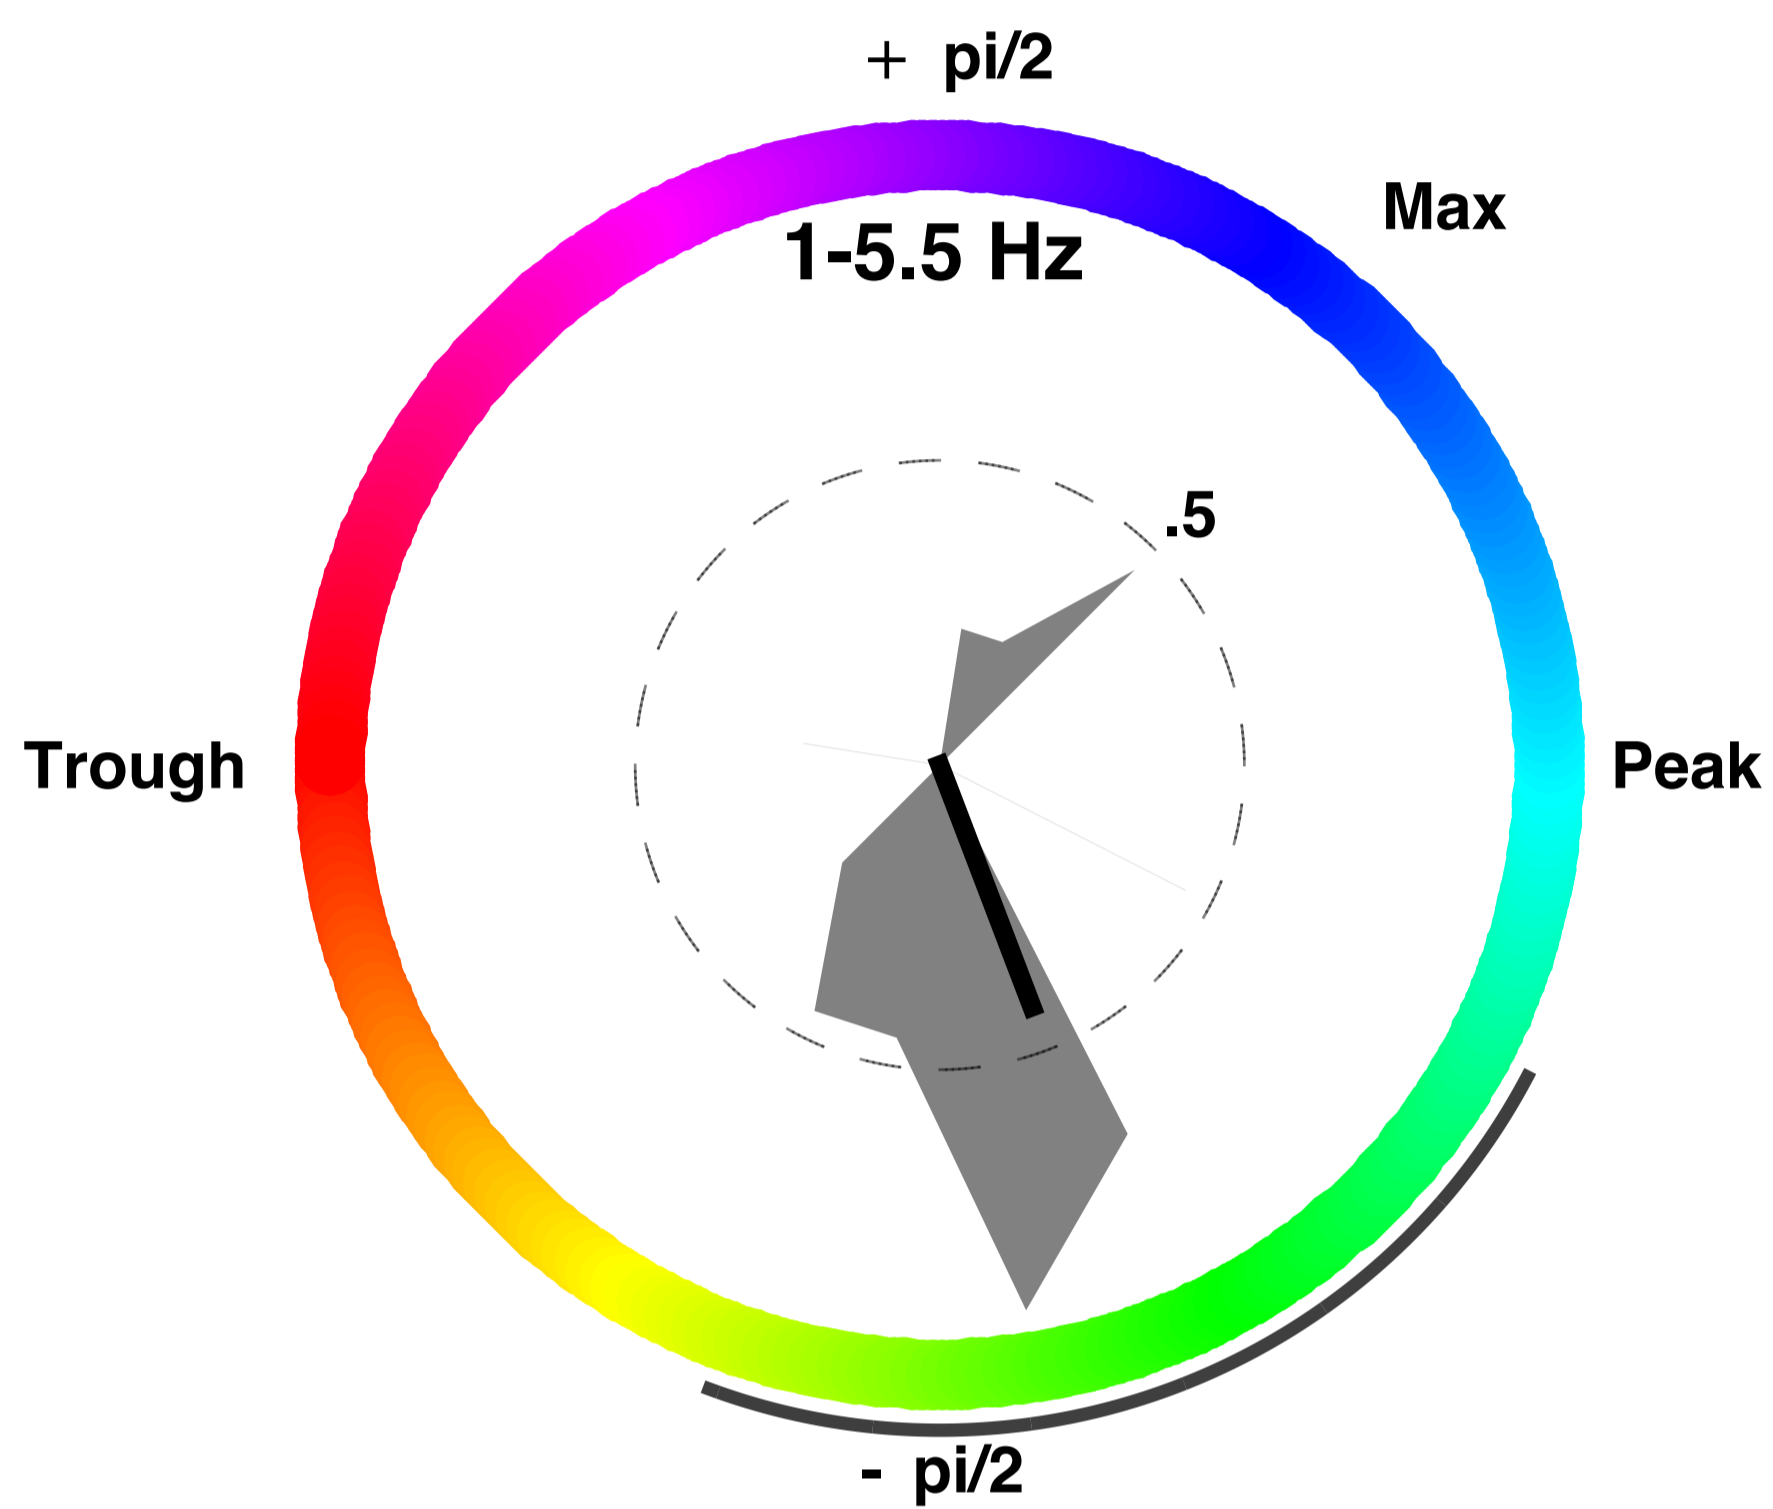

**C.** Spike Phases during Arrival

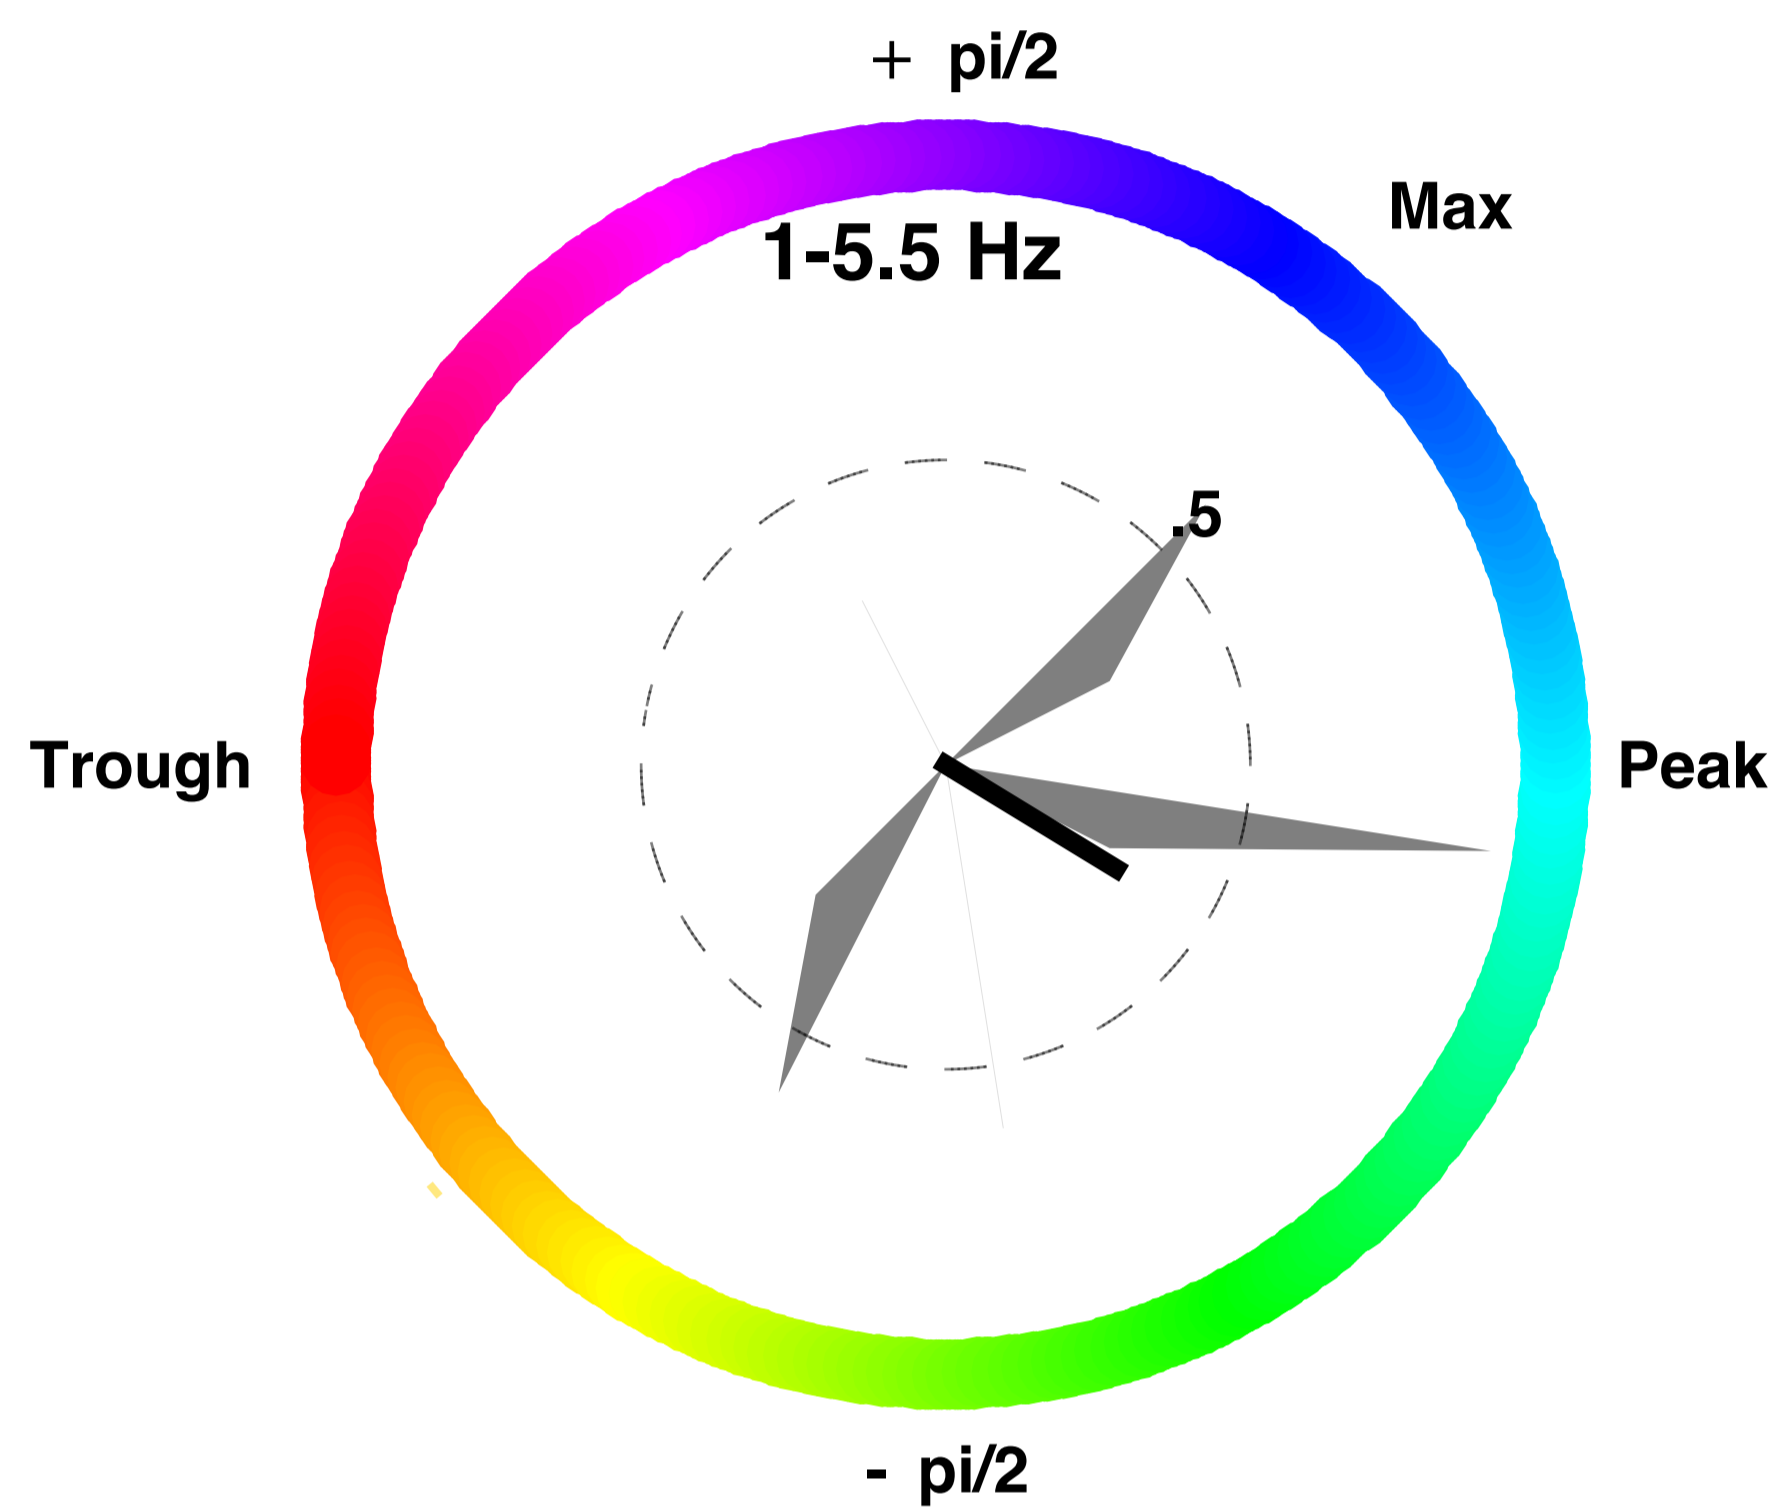

**D.** Example Delivery to **Goal 5**

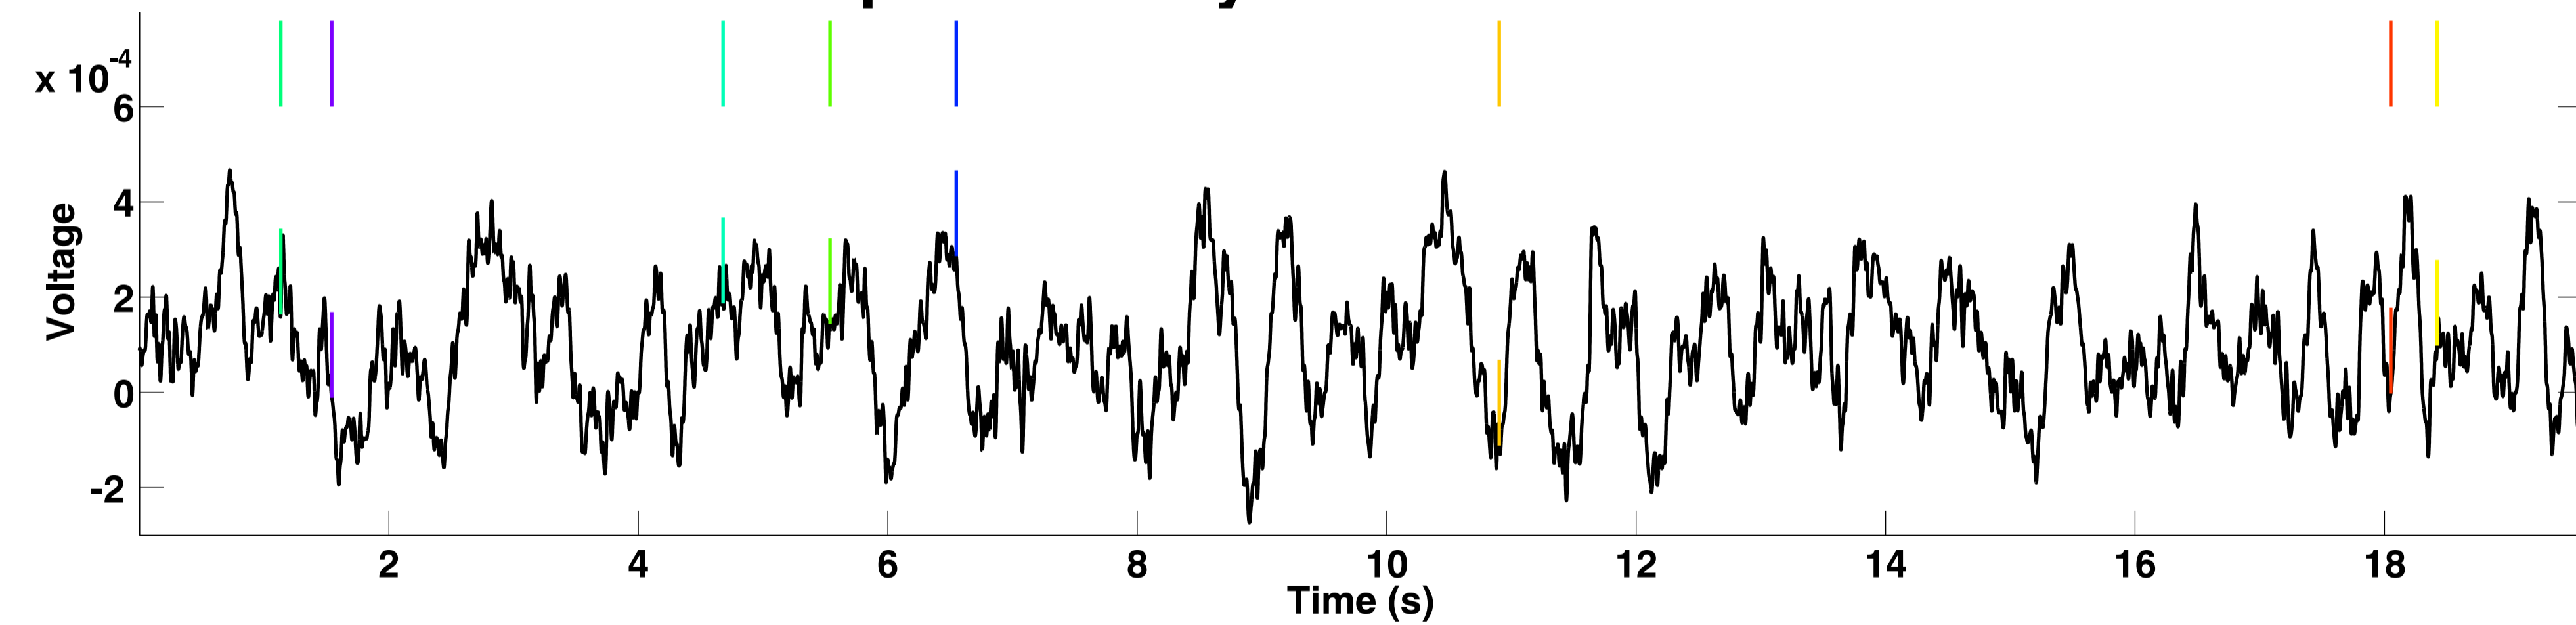

**E.** Spike Phases during Planning

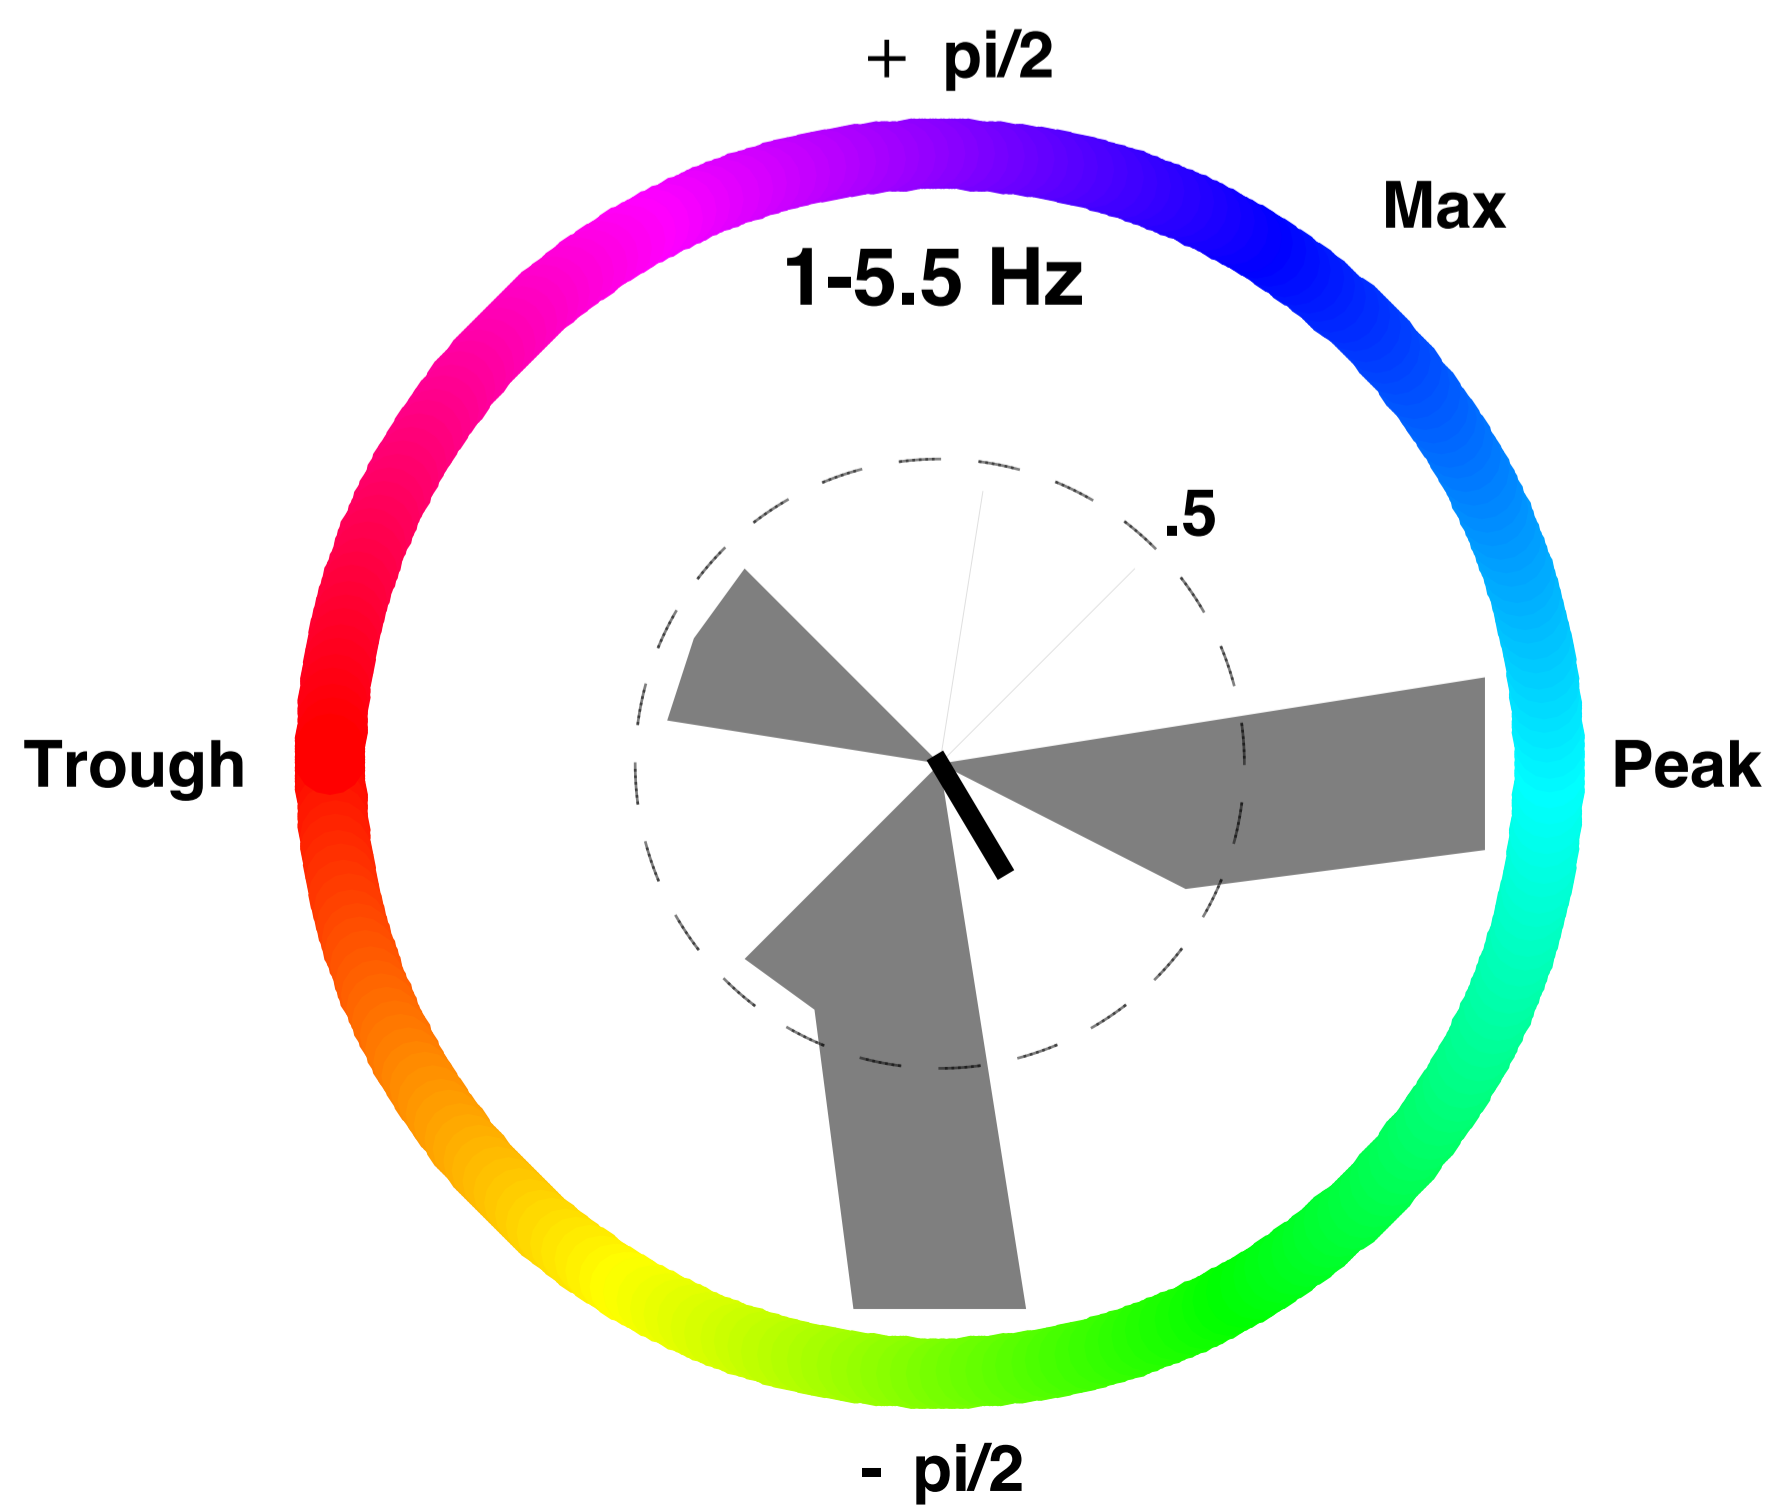

**F.** Spike Phases during Arrival

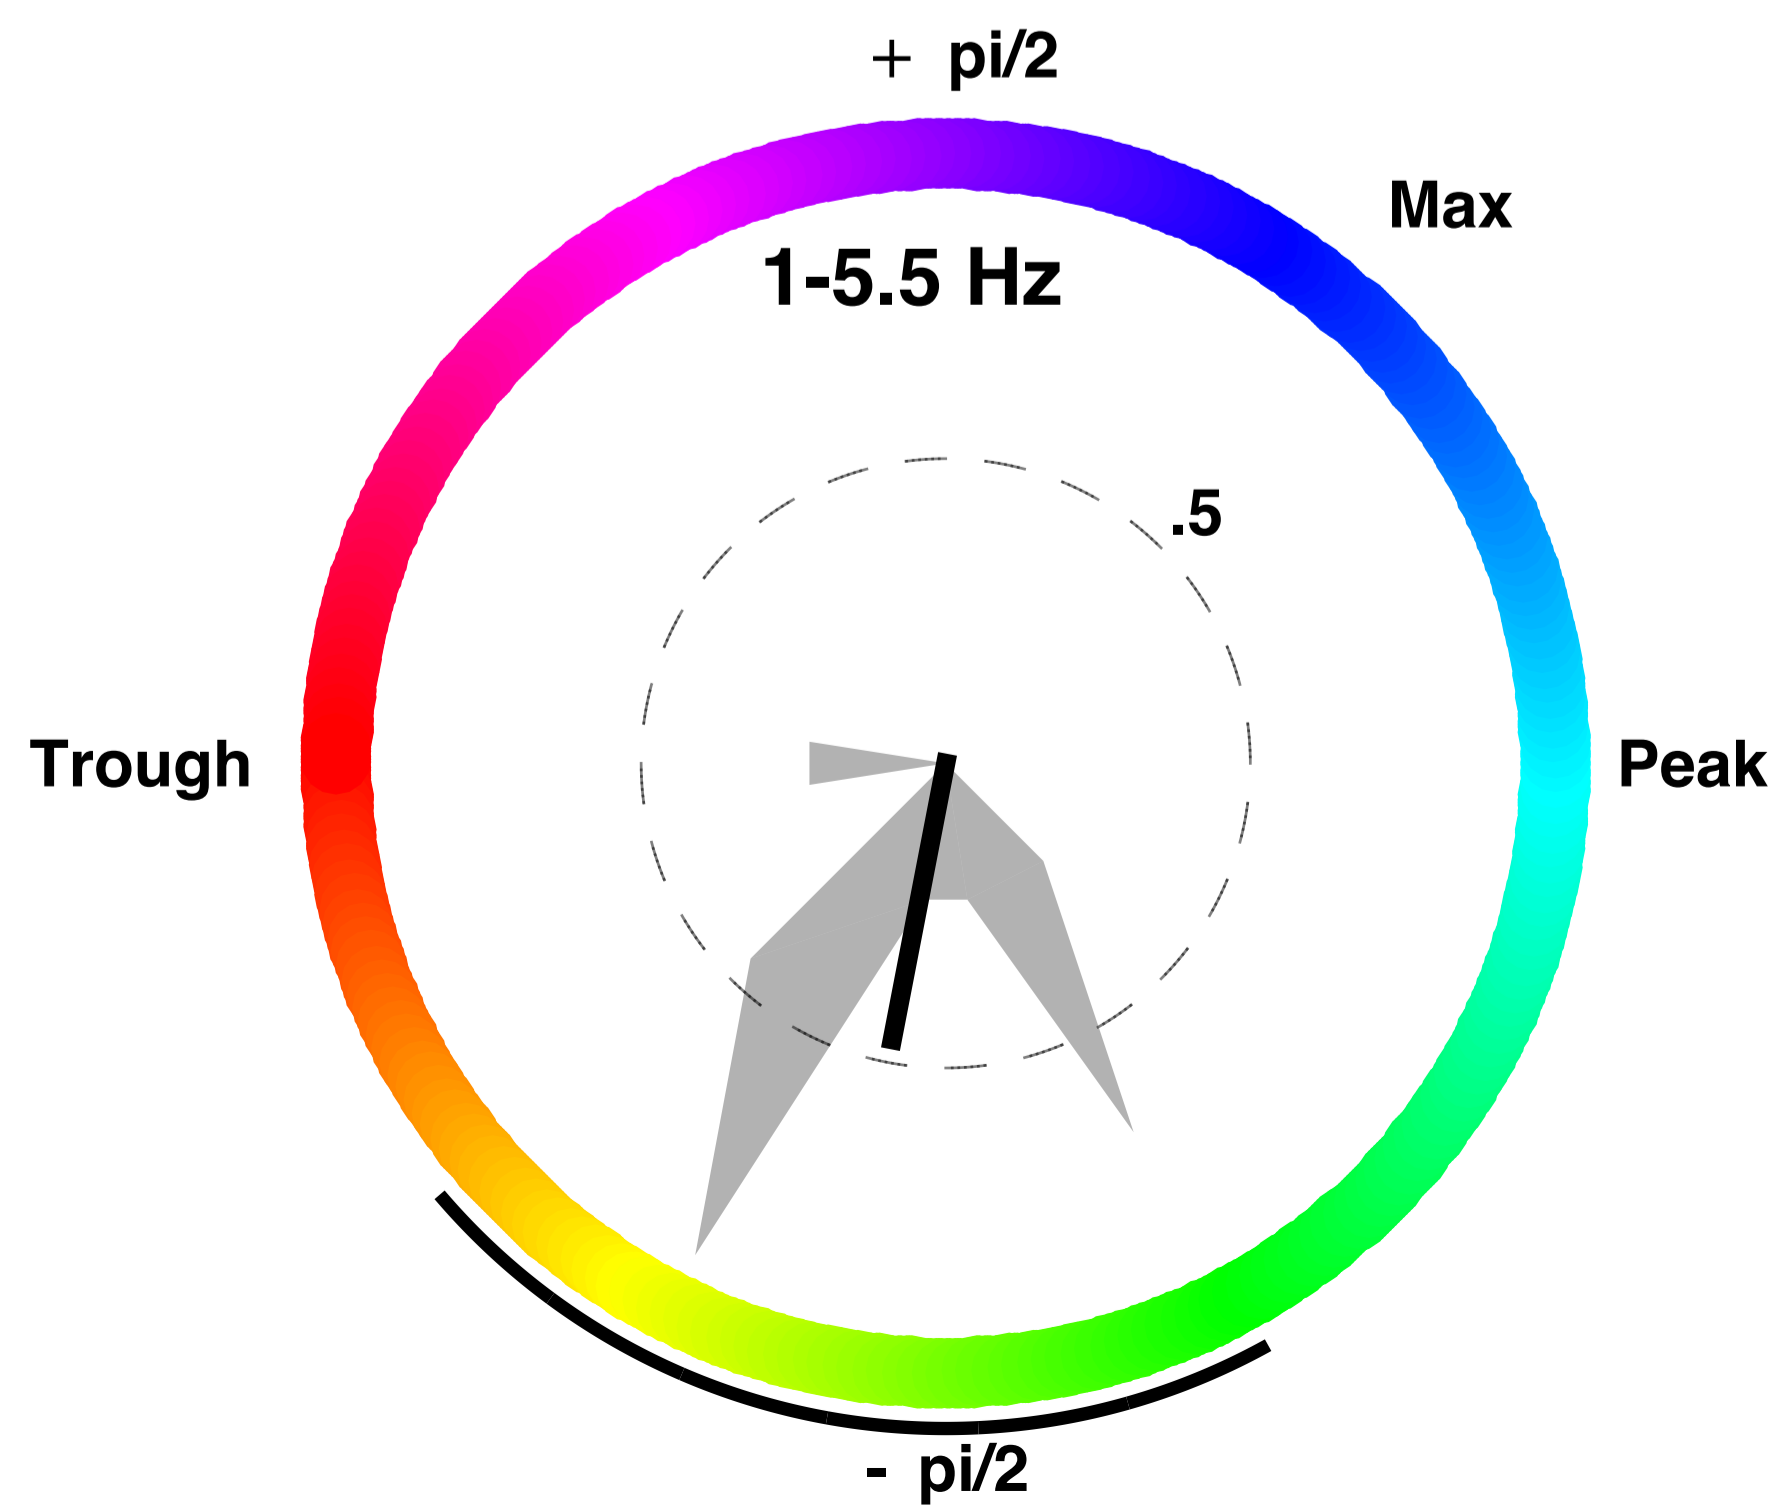

Supplement: supp [file elife-32554-supp-v1.zip › elife_poa_e32554_Figure_4_figure_supplement_1.pdf]
