# Supplementary figures and images for: Phase-tuned neuronal firing encodes human contextual representations for navigational goals
Source: eLife journal article supplement (doi:10.7554/elife.32554), 2018-06-22

A.

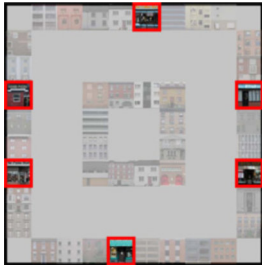

B.

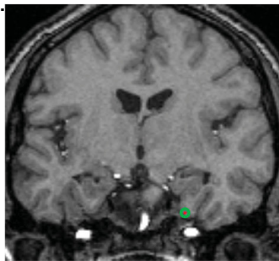

C.

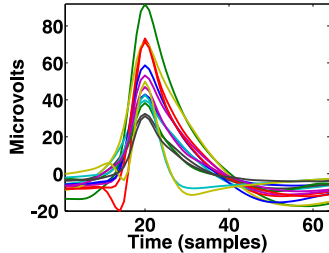

Supplement: supp [file elife-32554-supp-v1.zip › elife_poa_e32554_Figure_1_figure_supplement_1.pdf]

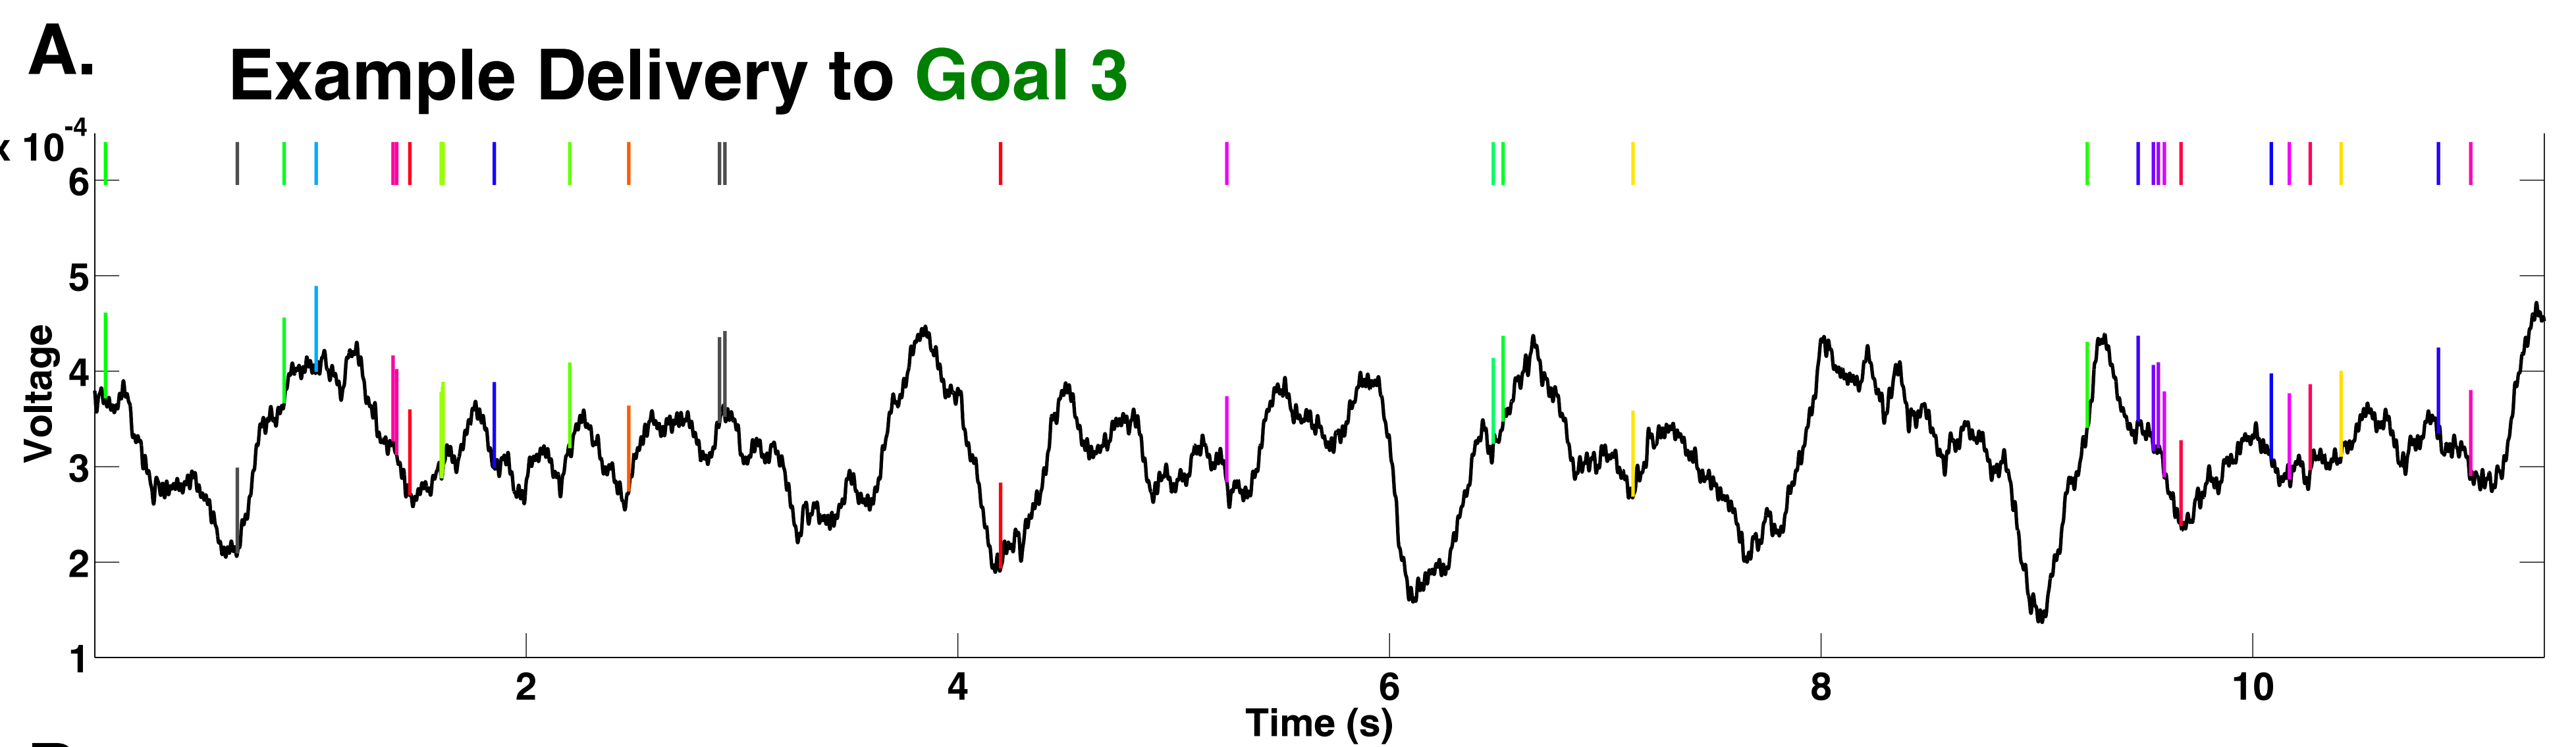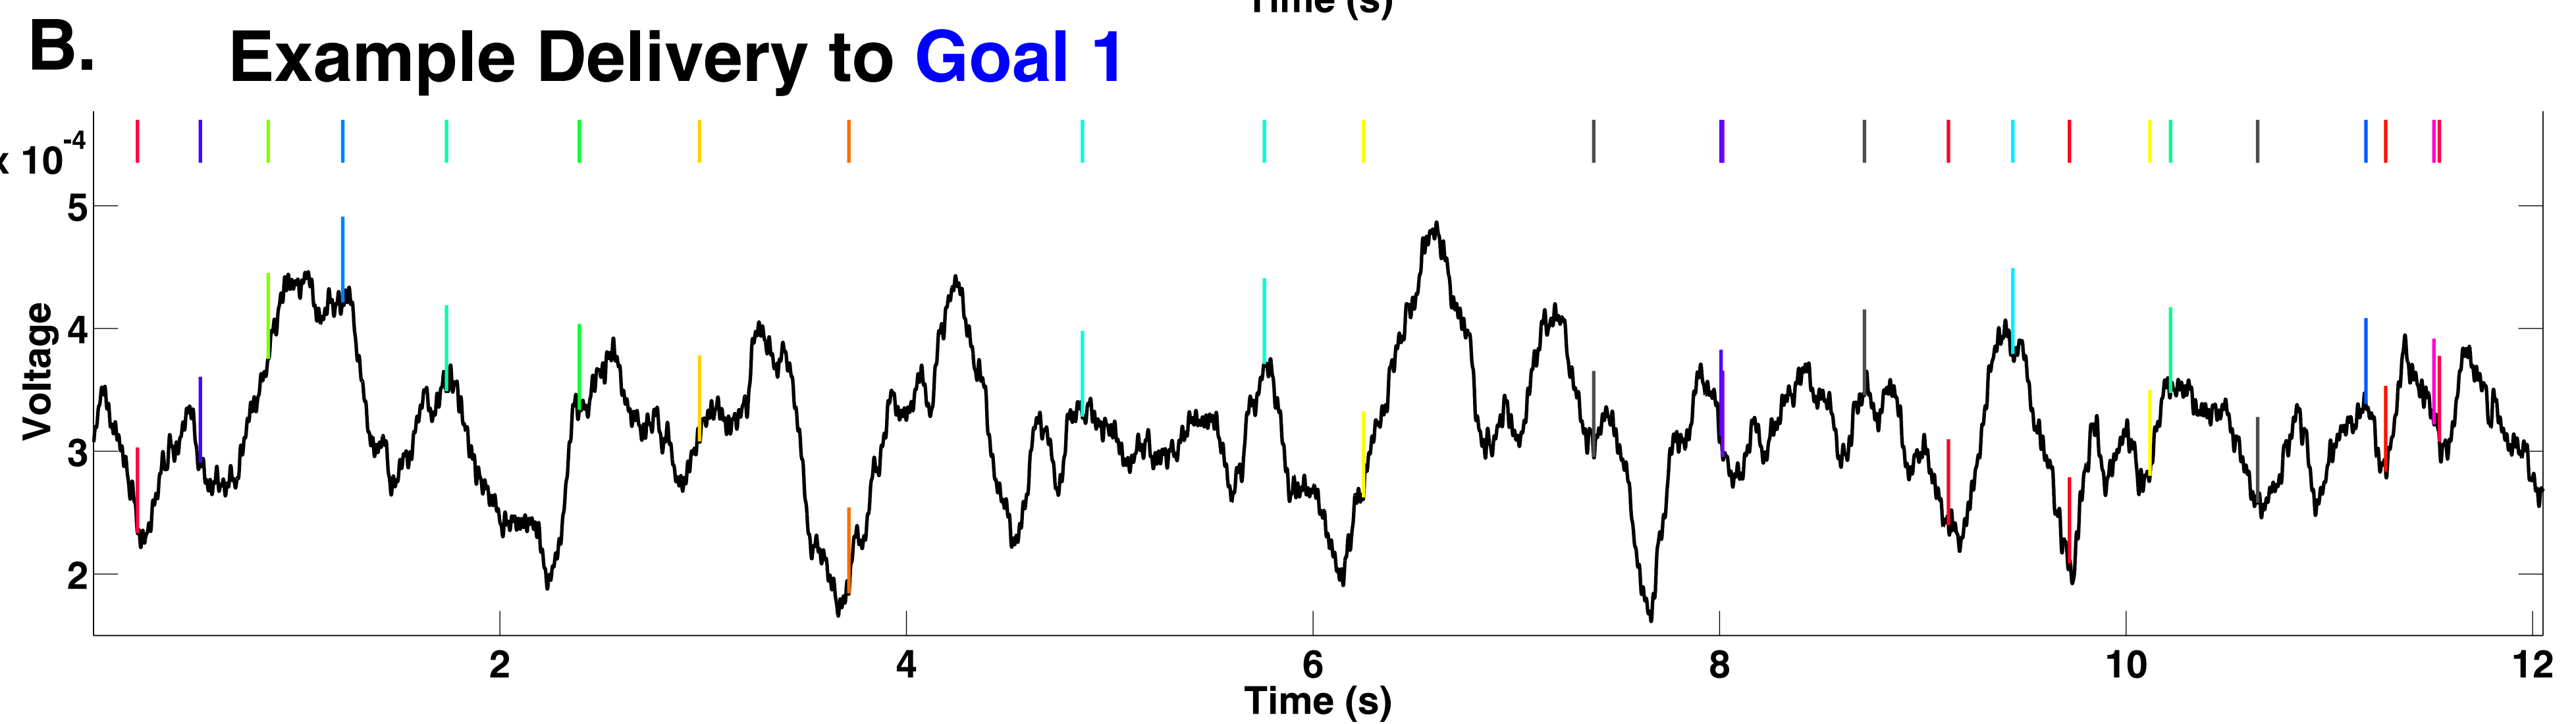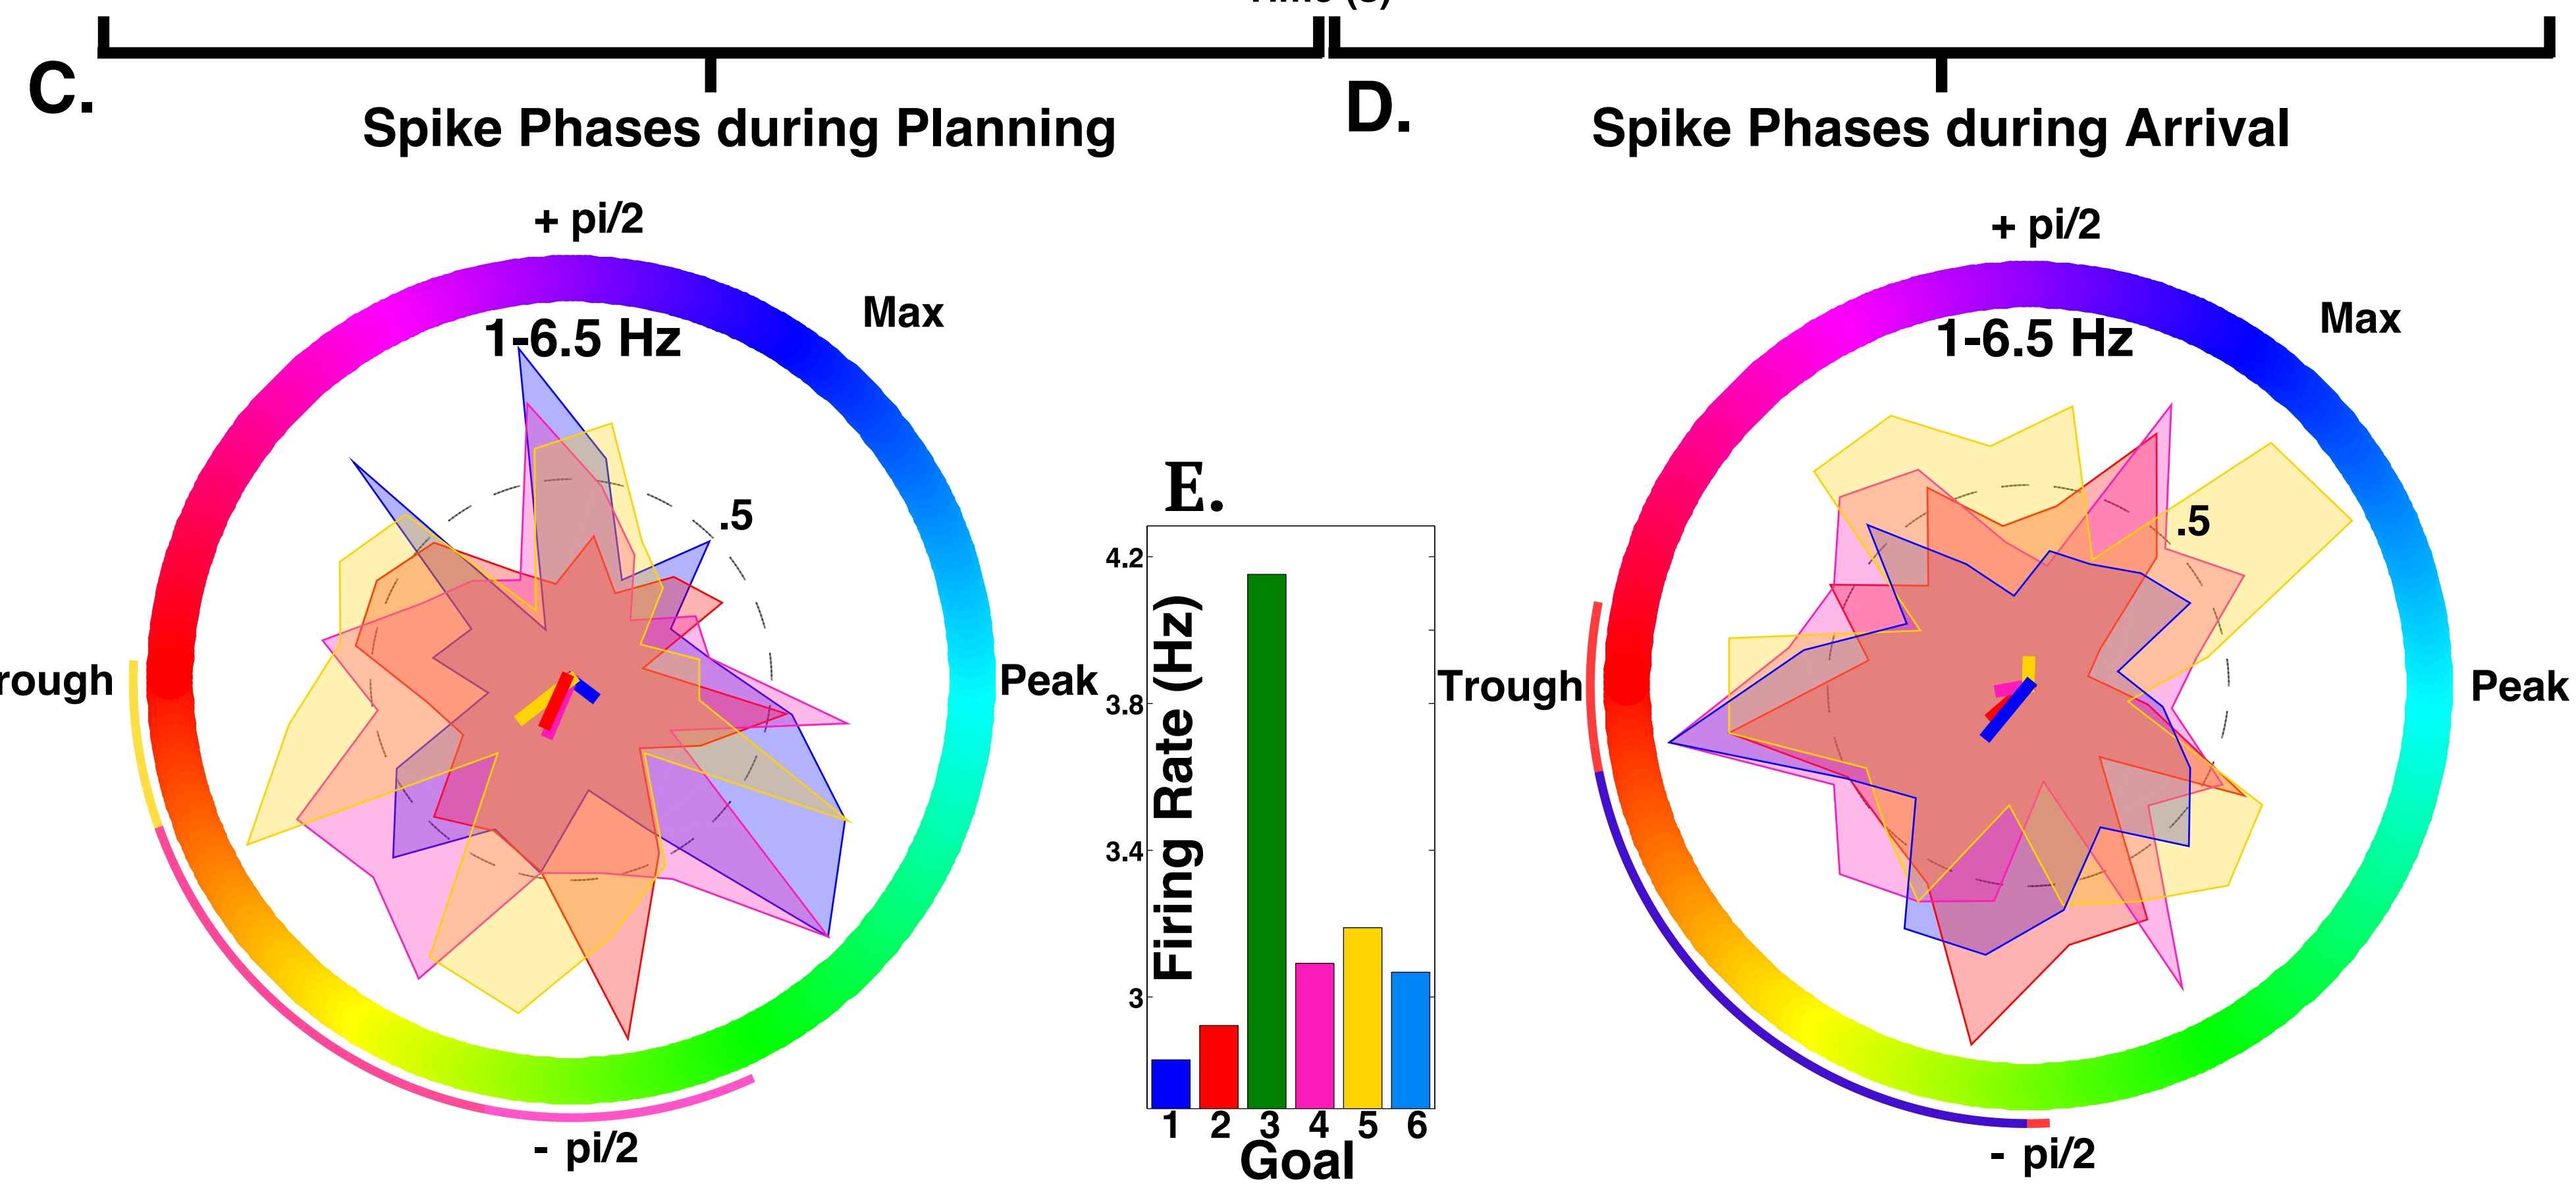

Supplement: supp [file elife-32554-supp-v1.zip › elife_poa_e32554_Figure_4_figure_supplement_2.pdf]

**A.** Raw data from Frontal Channel #25

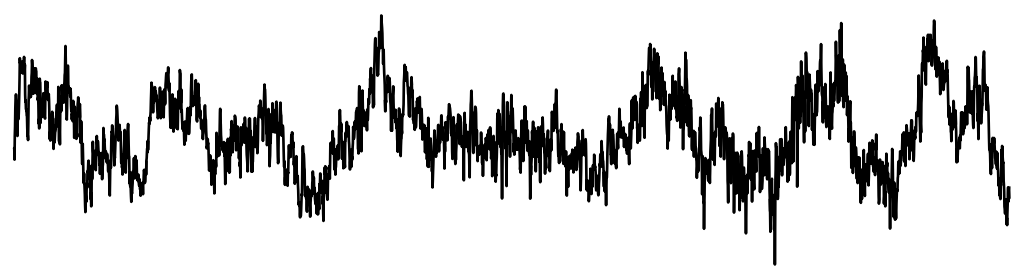

1 second

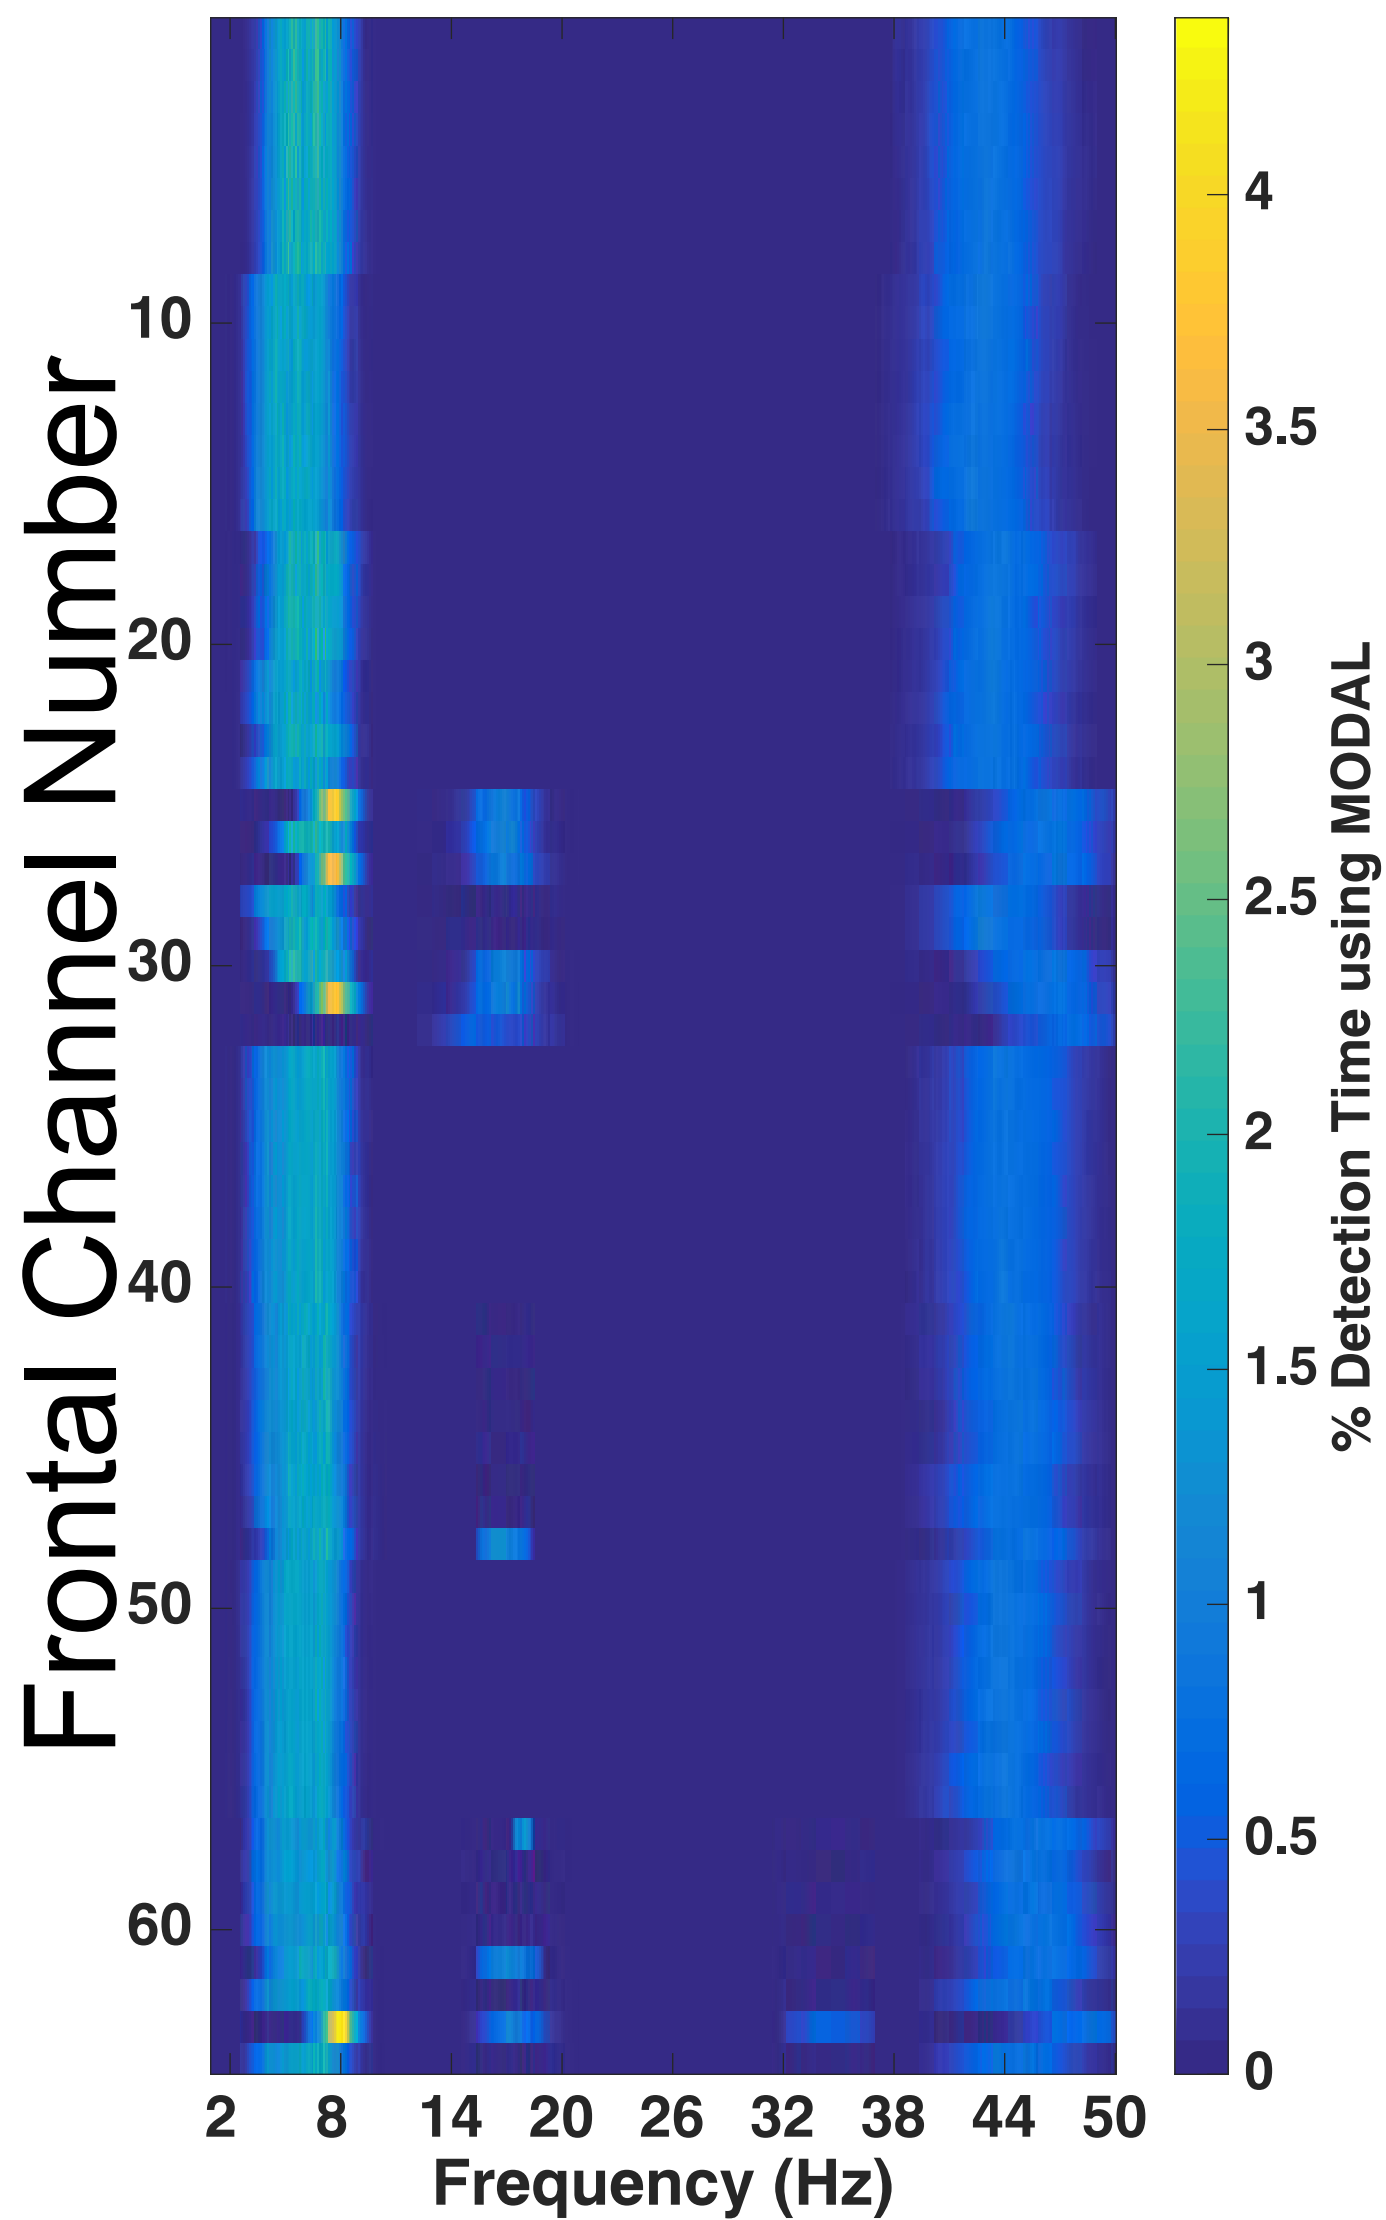

**B.** Raw data from CA1 Channel #1

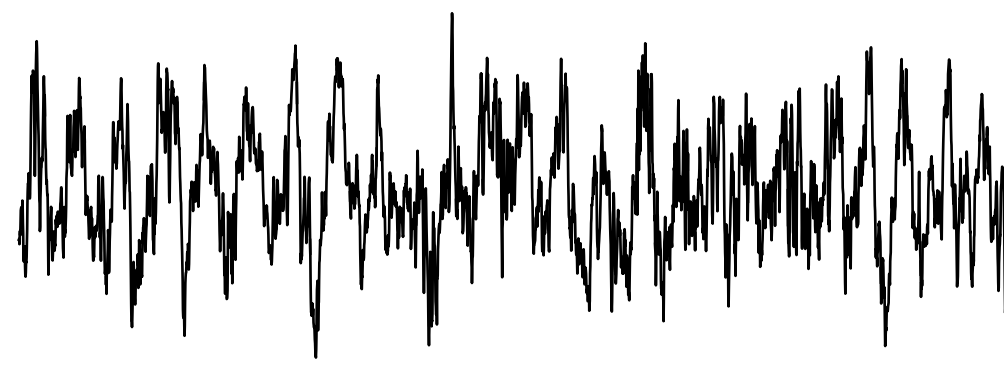

1 second

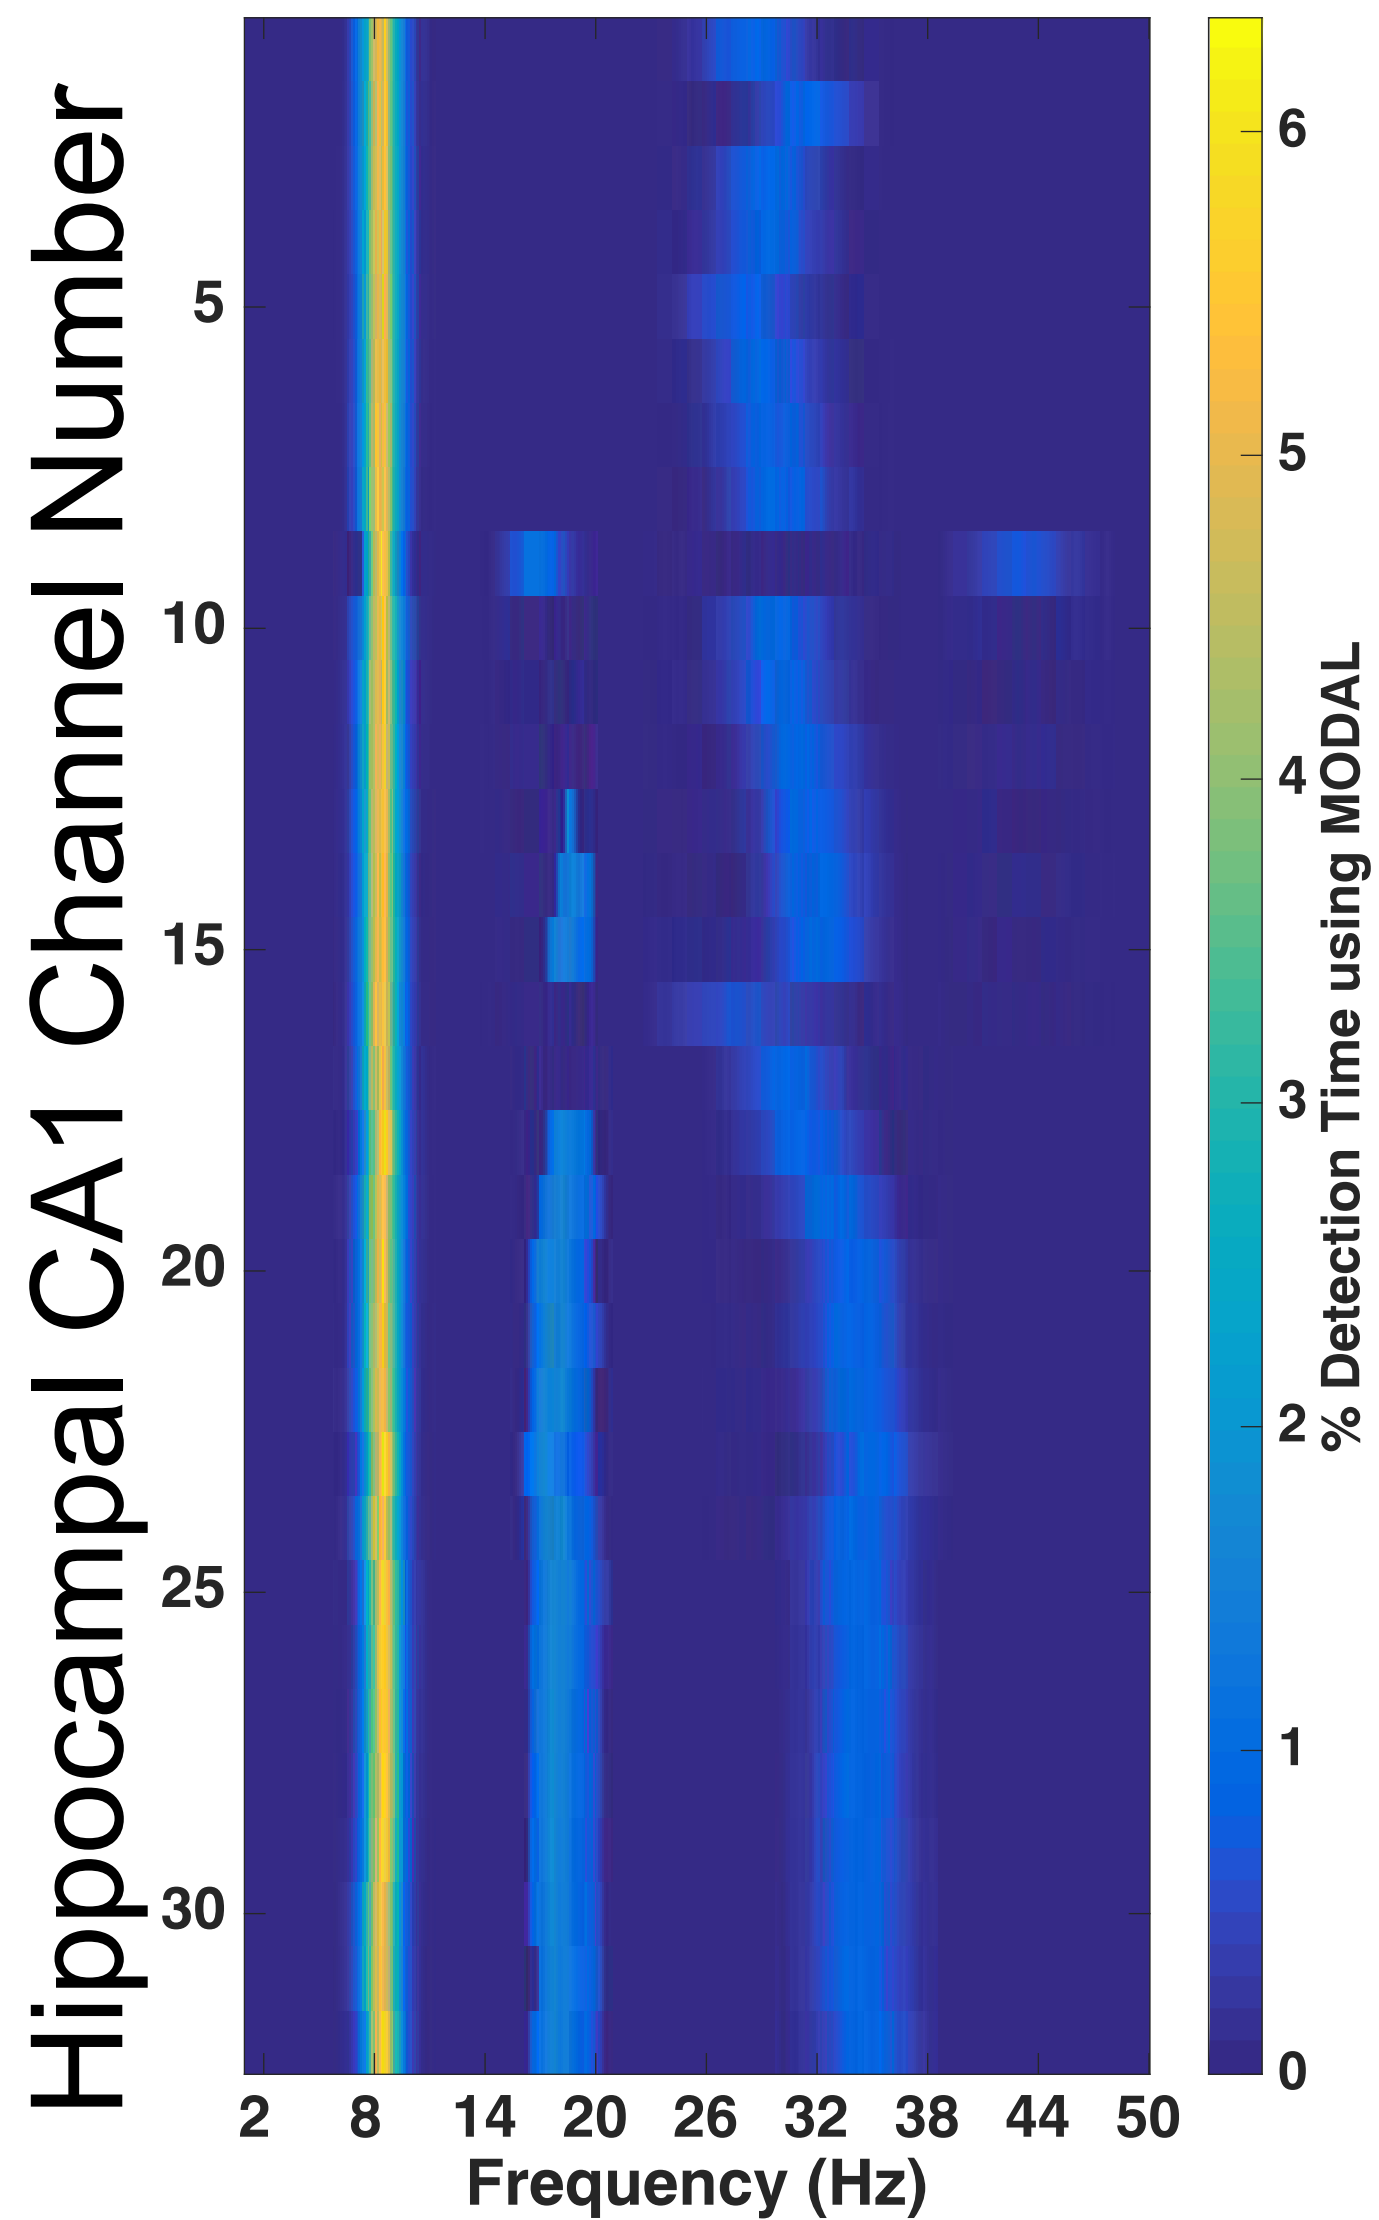

Supplement: supp [file elife-32554-supp-v1.zip › elife_poa_e32554_Figure_2_figure_supplement_2.pdf]

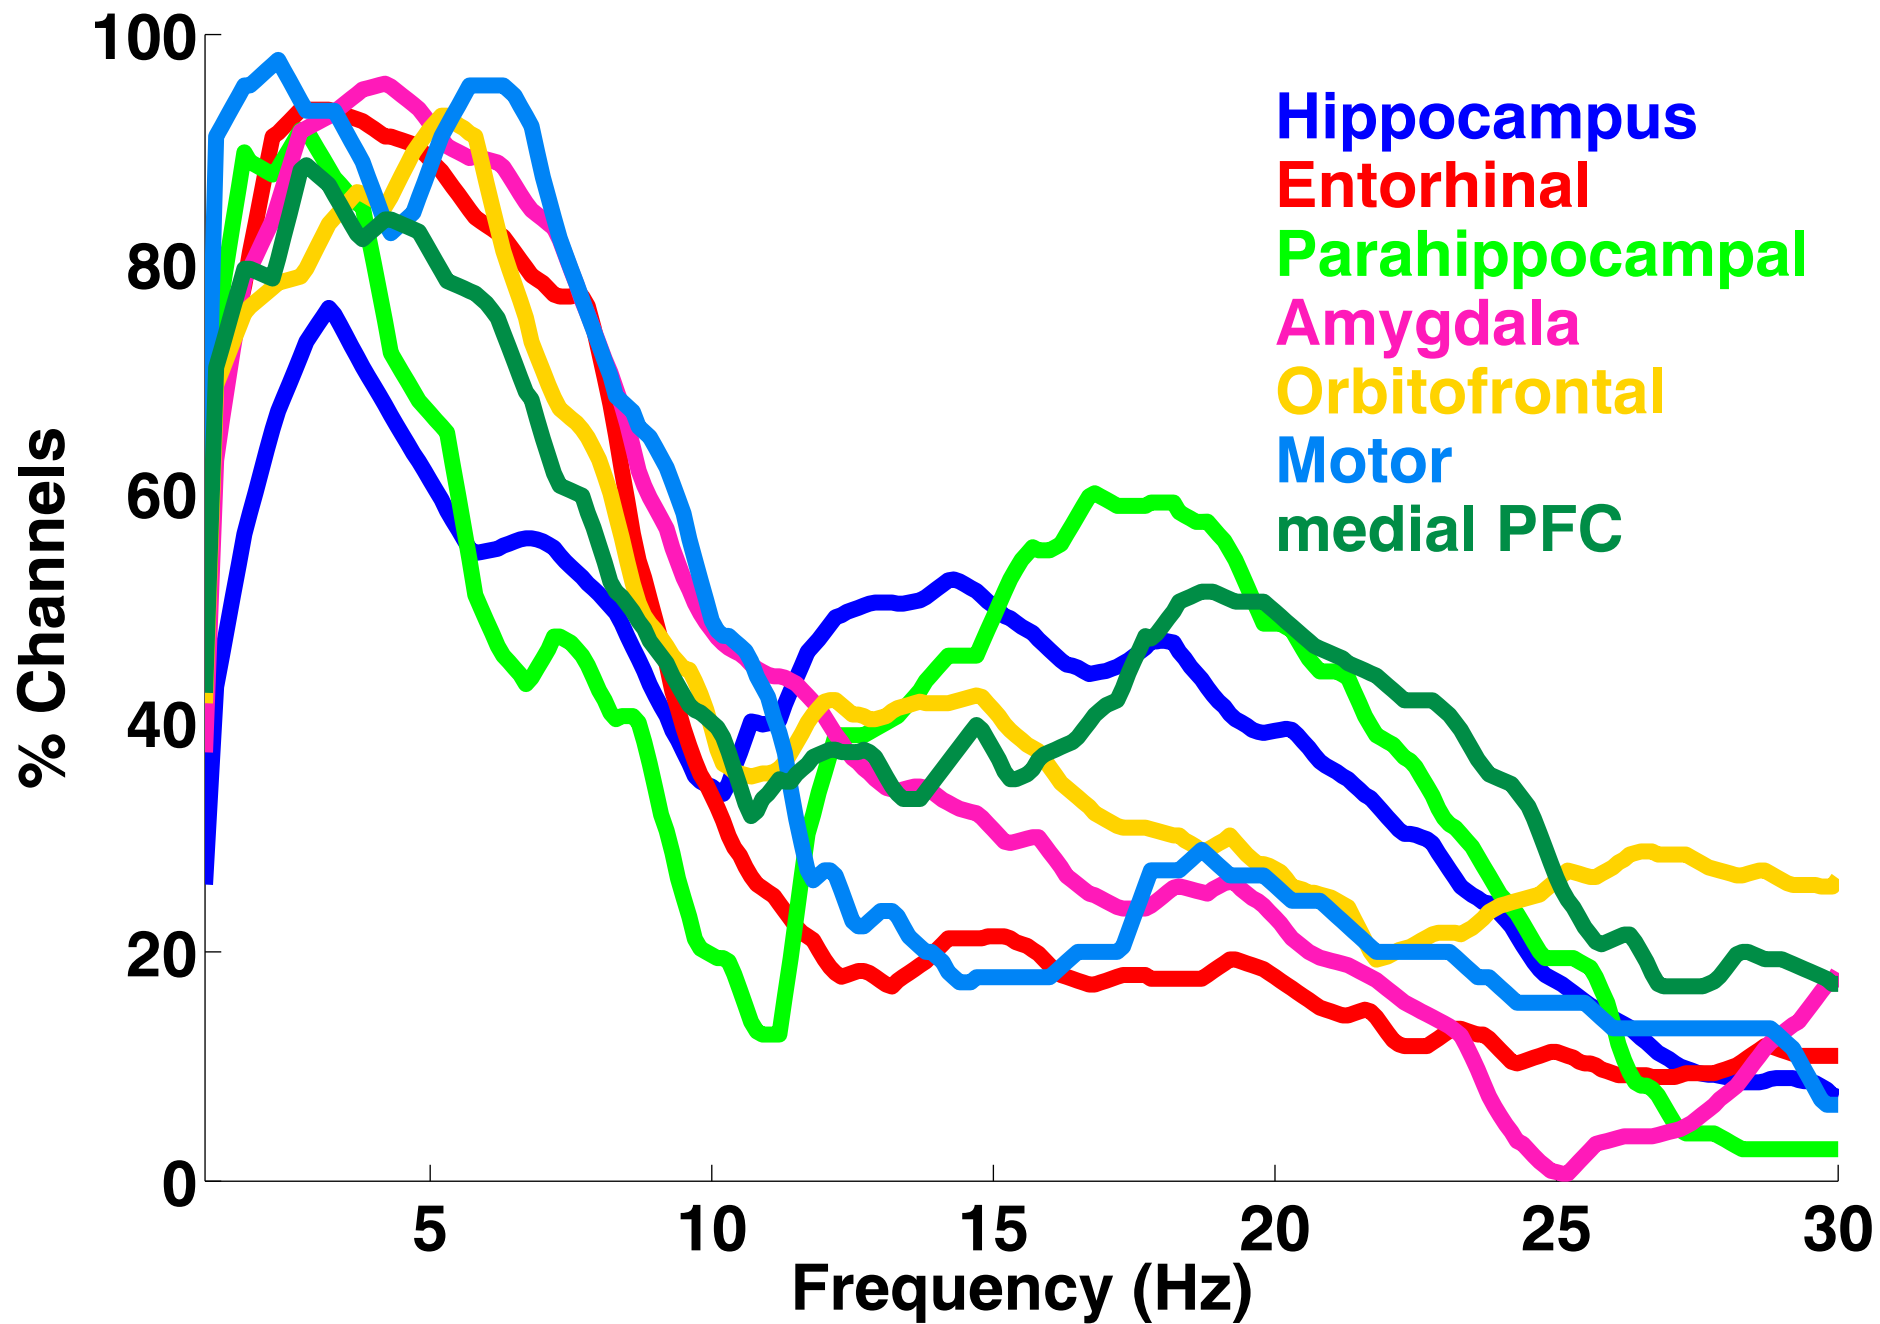

Supplement: supp [file elife-32554-supp-v1.zip › elife_poa_e32554_Figure_2_figure_supplement_1.pdf]
